# Supplementary material
Source: PubMed Central journal article supplement (PMC8134187)

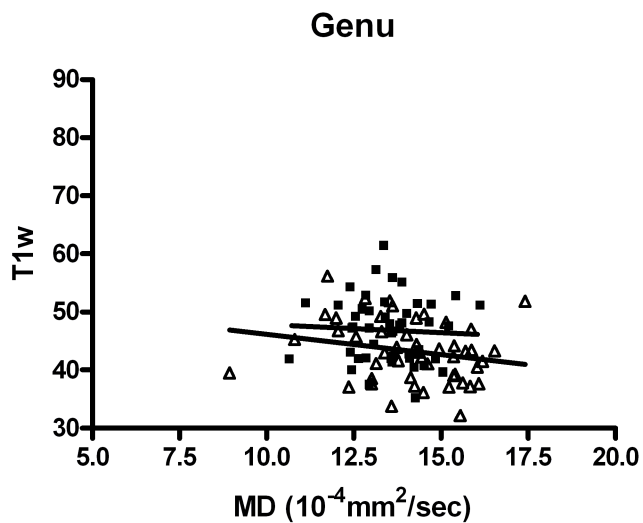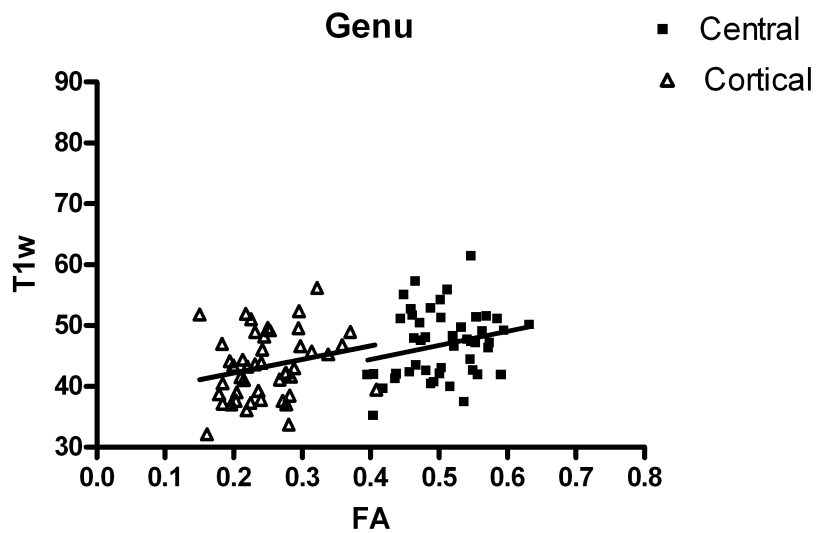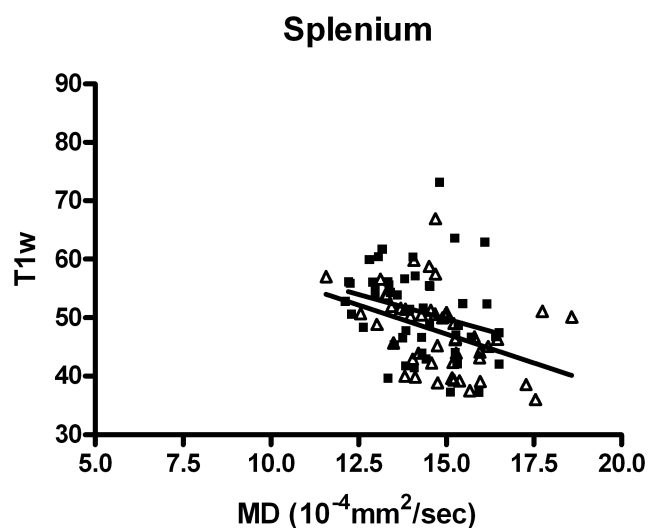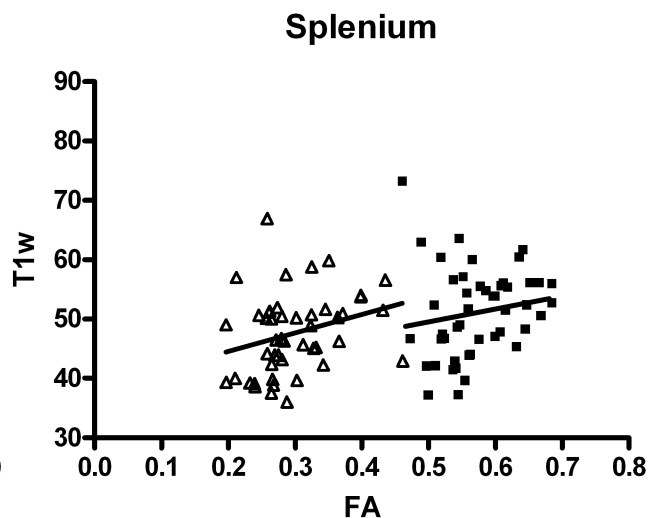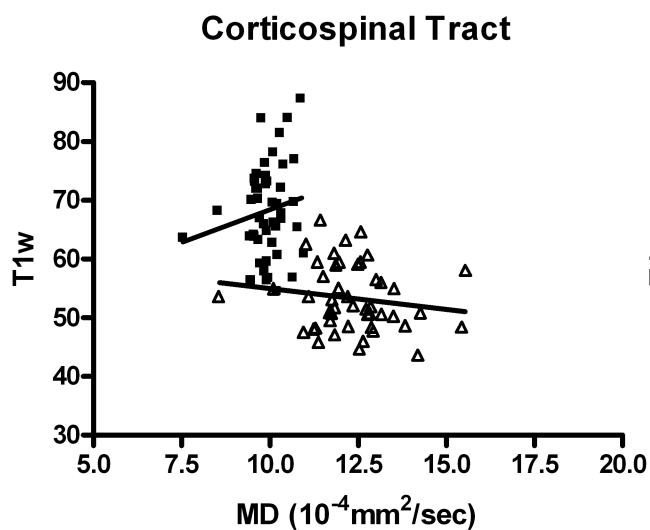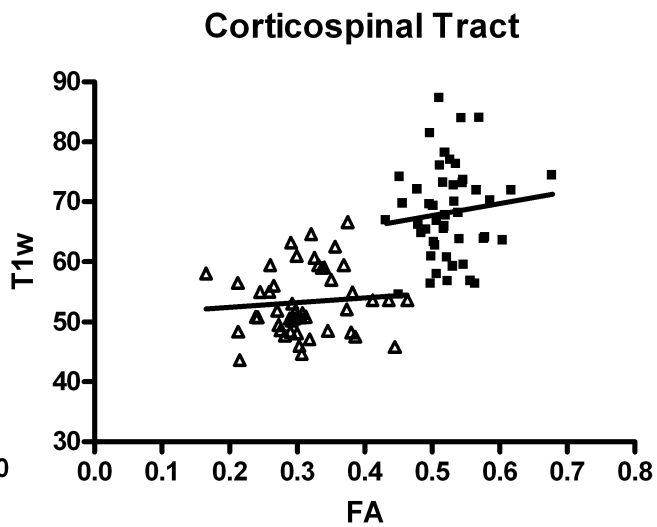

Supplement: Figure_5.pdf [file Figure_5.pdf]
